# Supplementary material for: Comparing the Role of ROS and RNS in the Thermal Stress Response of Two Cnidarian Models, Exaiptasia diaphana and Galaxea fascicularis
Source: Antioxidants (Basel). 2023 May 6;12(5):1057. doi: 10.3390/antiox12051057 (PMC10215338; doi:10.3390/antiox12051057)
Supplement: Supplementary file 1 [file antioxidants-12-01057-s001.zip › antioxidants-2281009-supplementary.pdf]

## Supplementary Material:

# Comparing the role of ROS and RNS in the thermal stress response of two cnidarian models, *Exaiptasia diaphana* and *Galaxea fascicularis*

Talisa Doering <sup>1,\*</sup>, Justin Maire <sup>1</sup>, Wing Yan Chan <sup>1</sup>, Alexis Perez-Gonzalez <sup>2,3</sup>, Luka Meyers <sup>1</sup>, Rumi Sakamoto <sup>1</sup>, Isini Buthgamuwa <sup>1</sup>, Linda L. Blackall <sup>1</sup> and Madeleine J. H. van Oppen <sup>1,4,\*</sup>

<sup>1</sup> School of Biosciences, The University of Melbourne, Parkville, VIC 3010, Australia

<sup>2</sup> Department of Microbiology and Immunology, The University of Melbourne at the Peter Doherty Institute of Infection and Immunity, Parkville, VIC 3010, Australia

<sup>3</sup> Melbourne Cytometry Platform, The University of Melbourne, Parkville, VIC 3010, Australia

<sup>4</sup> Australian Institute of Marine Science, Townsville MC, QLD 4810, Australia

\* Correspondence: tdoring@student.unimelb.edu.au (T.D.);

madeleine.van@unimelb.edu.au (M.J.H.v.O.);

Tel.: +65-491-190045

**Citation:** Doering, T.; Maire, J.; Chan, W.Y.; Perez-Gonzalez, A.; Meyers, L.; Sakamoto, R.; Buthgamuwa, I.; Blackall, L.L.; van Oppen, M.J.H. Comparing the Role of ROS and RNS in the Thermal Stress Response of Two Cnidarian Models, *Exaiptasia diaphana* and *Galaxea fascicularis*. *Antioxidants* **2023**, *12*, 1057. <https://doi.org/10.3390/antiox12051057>

Academic Editors: Stanley Omaye, Antonio Box Centeno and Xavier Capo

Received: 28 February 2023

Revised: 24 April 2023

Accepted: 29 April 2023

Published: 6 May 2023

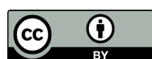

**Copyright:** © 2023 by the authors. Licensee MDPI, Basel, Switzerland. This article is an open access article distributed under the terms and conditions of the Creative Commons Attribution (CC BY) license (<https://creativecommons.org/licenses/by/4.0/>).

## 1. Supplemental Figures

### A. *Exaiptasia diaphana*

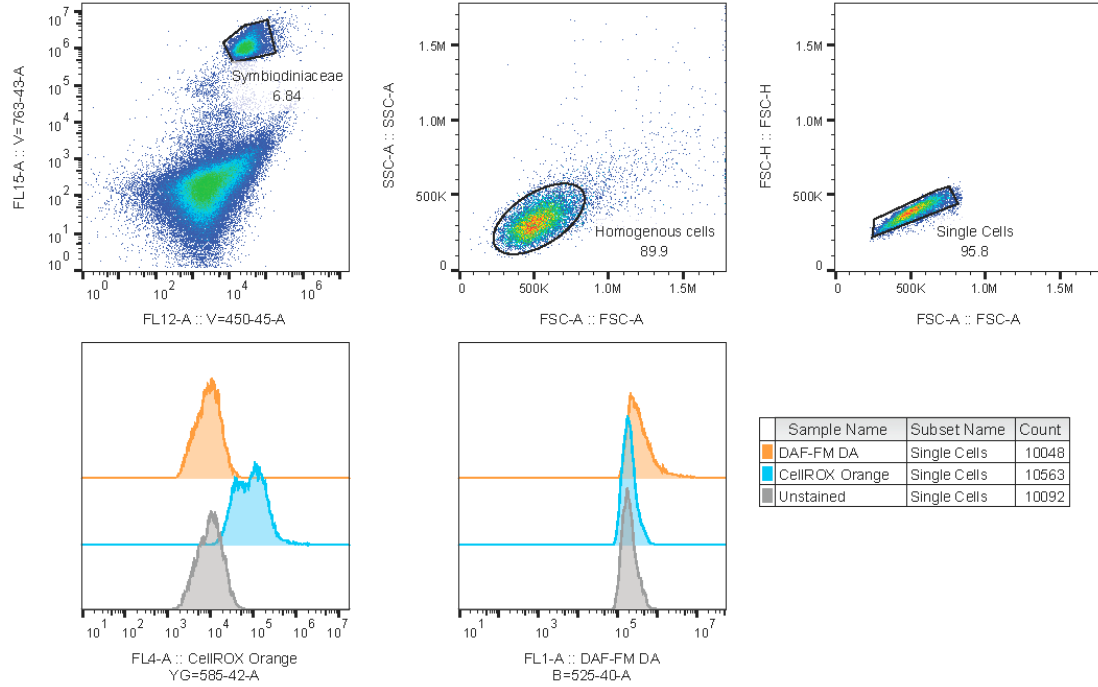

### B. *Galaxea fascicularis*

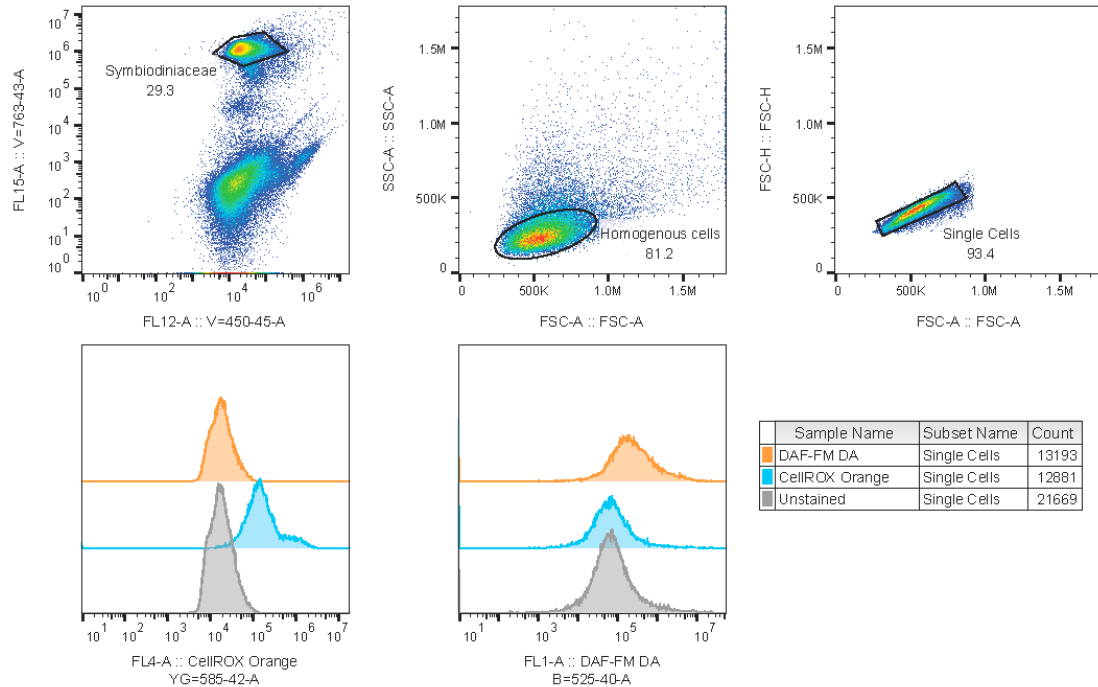

**Supplemental Figure 1.** ROS and RNS quantification in symbiodiniaceans freshly isolated from *Exaiptasia diaphana* (A) and *Galaxea fascicularis* (B). The same gating procedure was followed for both organisms. To separate symbiodiniaceans from host cells, bacteria, and debris, we first selected events strongly excited by the 405 nm laser at emissions  $450 \pm 22.5$  nm and  $763 \pm 21.5$  nm ("Symbiodiniaceae" gate). An FSC-A/SSC-A plot was then used to select homogenous cells ("Homogenous" gate) and singlets were gated on an FSC-H/FSC-A plot ("Single cells" gate).

CellROX® Orange signal (ROS dye) was quantified as the median signal of stained minus unstained cells on single cells gated on previous plots with the 561 nm laser (emission  $585 \pm 21$  nm). DAF-FM DA signal (RNS dye) was quantified as the median signal of stained minus unstained cells on single cells gated on previous plots with the 488 nm laser (emission  $525 \pm 20$  nm). At least 10,000 symbiodiniacean singlets per sample were processed, except in samples where symbiodiniacean cell density was low because of advanced bleaching.

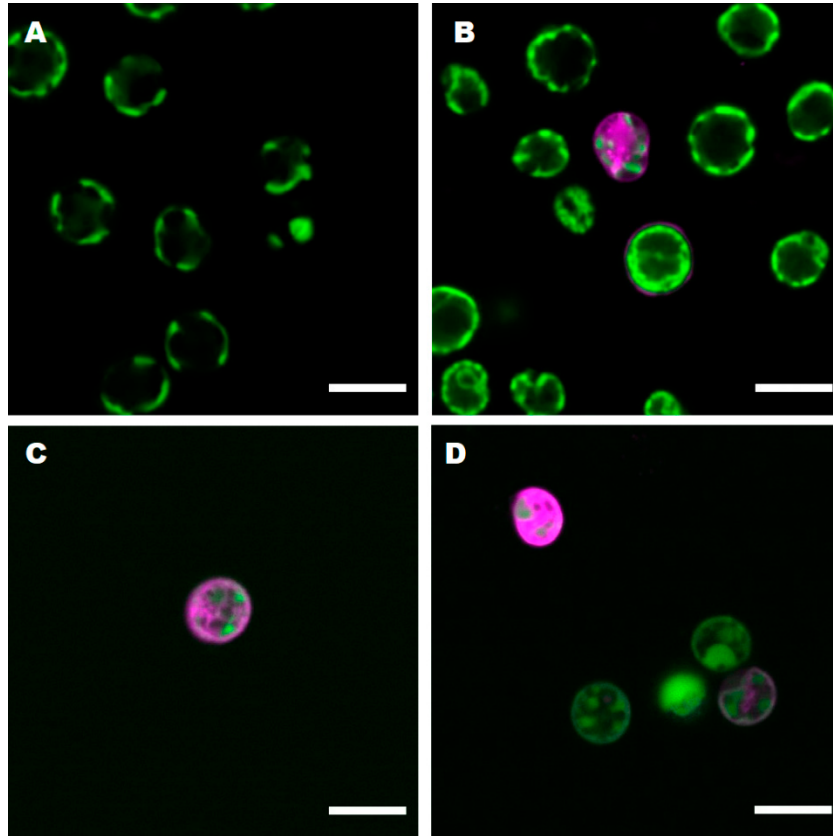

**Supplemental Figure 2.** Confocal laser scanning micrographs of **A:** cultured unstained *Breviolum minutum* (MMSF01, isolated from *Exaiptasia diaphana*), **B:** DAF-FM-DA stained *B. minutum*, **C-D:** DAF-FM-DA stained *E. diaphana* homogenate. Green indicates symbiodiniacean chl *a* autofluorescence and magenta indicates nitric oxide-dependent DAF-FM-DA fluorescence. DAF-FM-DA was detected using a 488 nm laser and its fluorescence was detected at emission 497-557 nm. A 568 nm laser was applied to detect chlorophyll *a* autofluorescence, that was detected at 600-710 nm. White scale bar = 10  $\mu$ m.

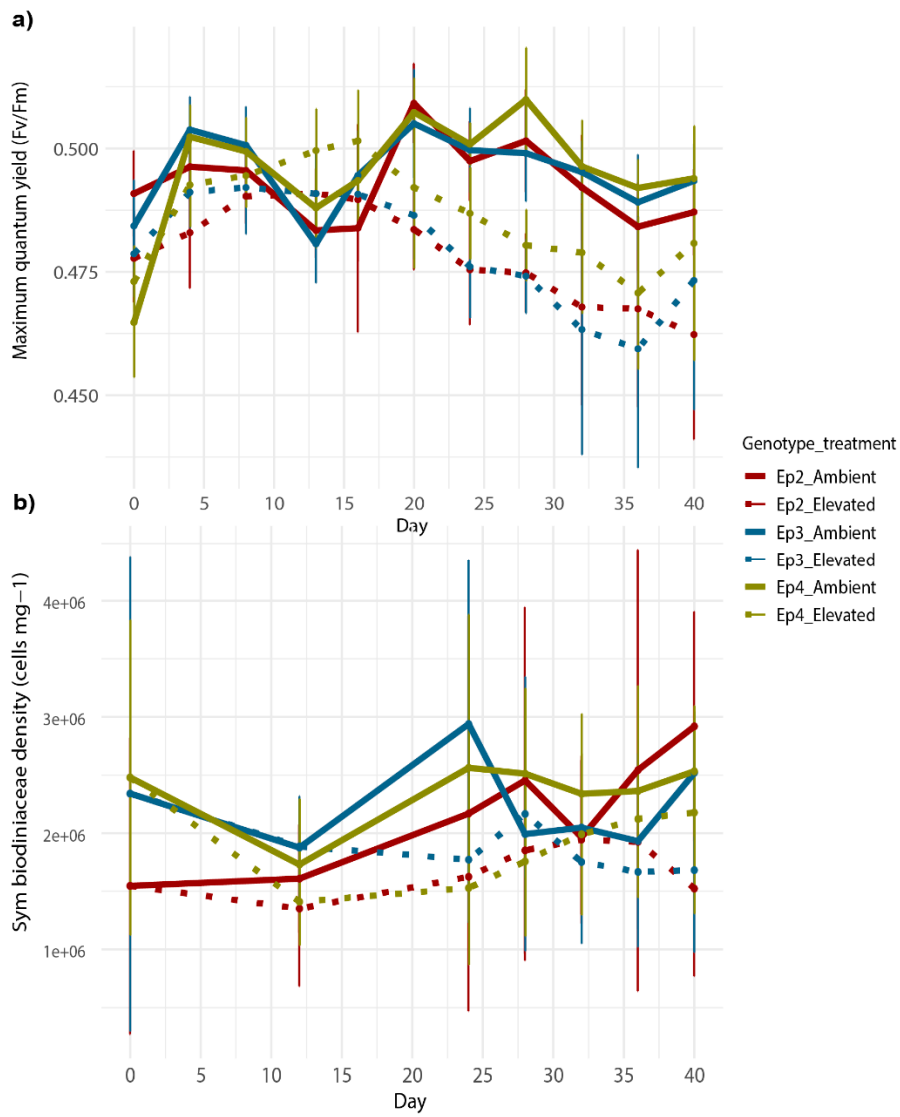

**Supplemental Figure 3. a)** Maximum quantum yield of symbiodiniaceans ( $F_v/F_m$ ) ( $n=20$  per genotype per treatment) and **b)** symbiodiniacean cell density ( $n=5$ ) of *Exaiptasia diaphana*. Bars depict standard deviation.

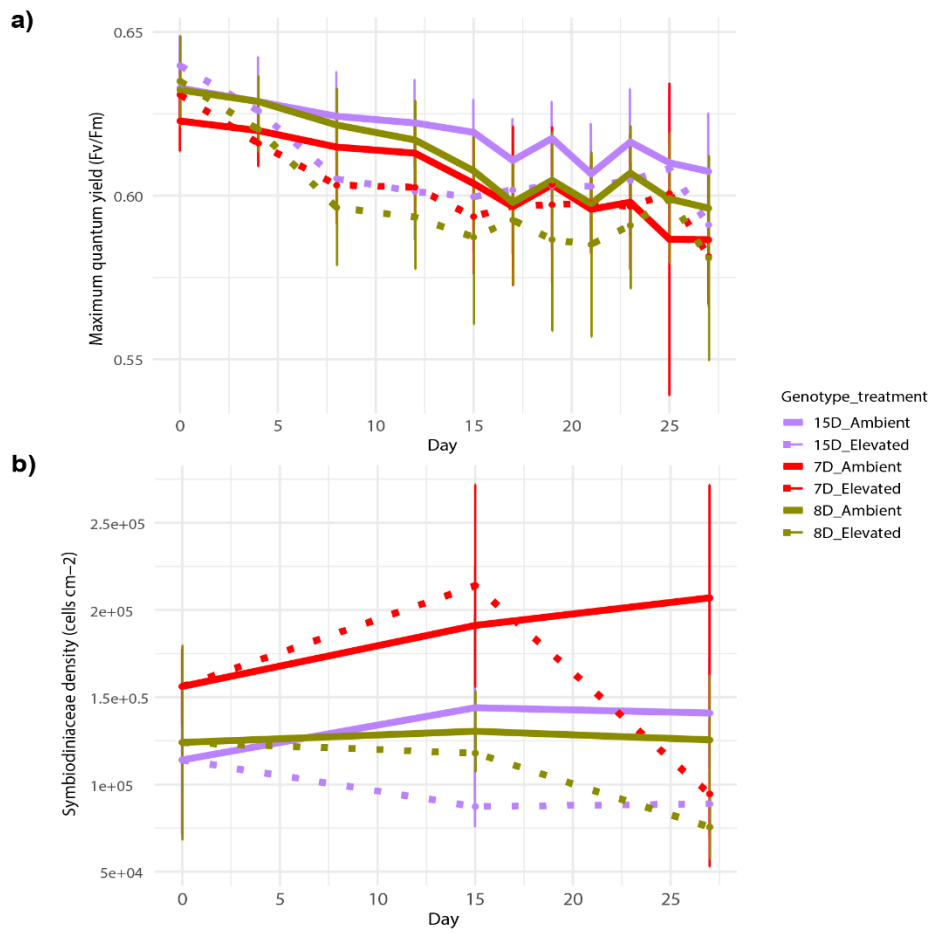

**Supplemental Figure 4.** **a)** Maximum quantum yield of symbiodiniaceans ( $F_v/F_m$ ) ( $n=20$  per colony per treatment) and **b)** symbiodiniacean cell density ( $n=5$ ) of *Galaxea fascicularis*. Bars depict standard deviation.

**a)**

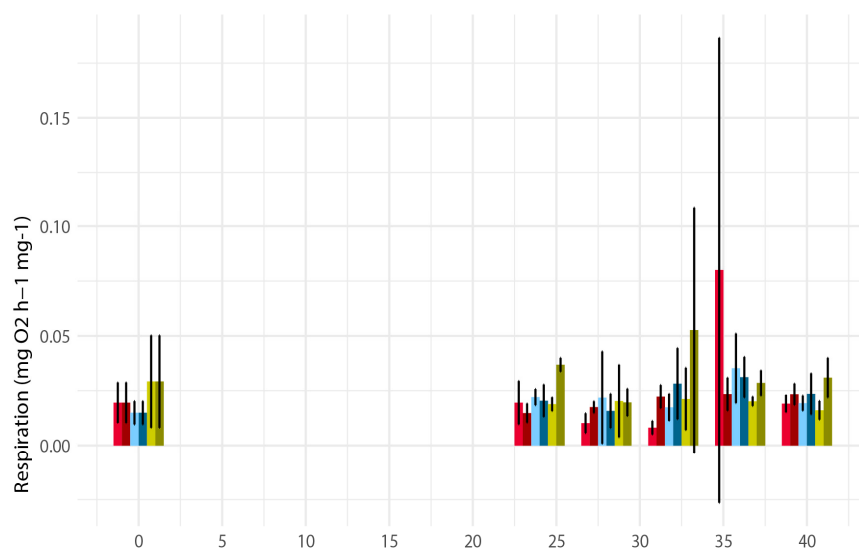

**b)**

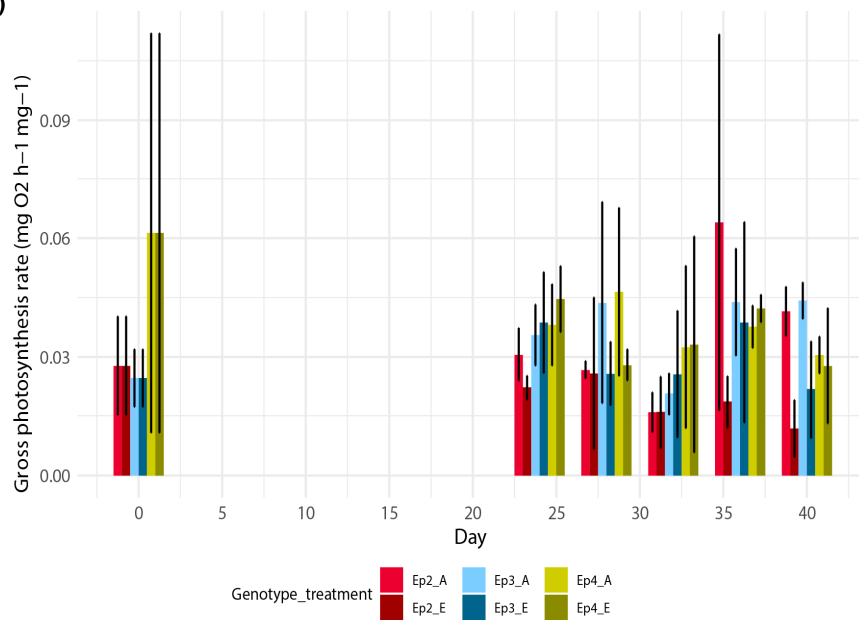

**Supplemental Figure 5. a)** Holobiont respiration rates ( $n=4$  per genotype per treatment) and **b)** gross photosynthesis rates ( $n=4$ ) of *Exaiptaisa diaphana*. Bars depict standard deviation.

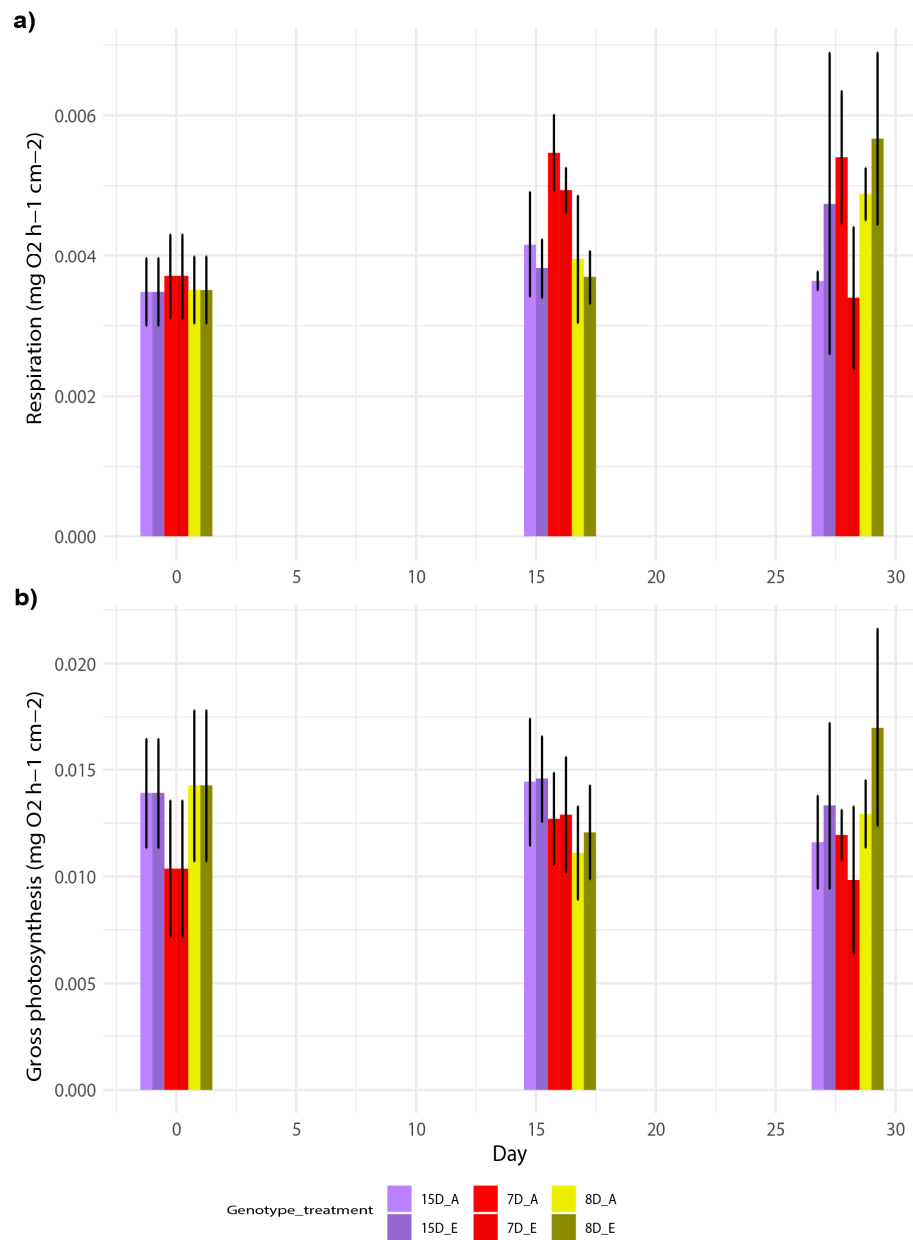

**Supplemental Figure 6.** **a)** Holobiont respiration rates ( $n=4$  per colony per treatment) and **b)** gross photosynthesis rates ( $n=4$ ) of *Galaxea fascicularis*. Bars depict standard deviation.

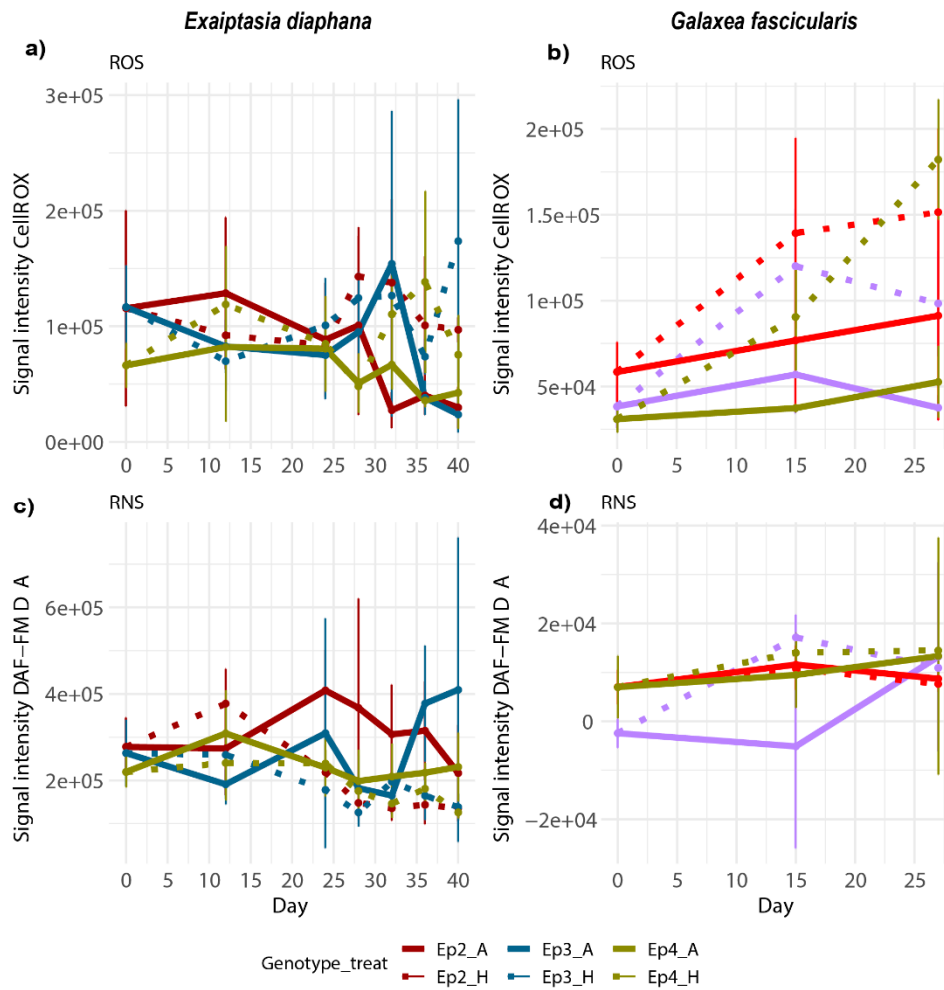

**Supplemental Figure 7.** Net ROS production of **a) *Exaiptasia diaphana*** and **b) *Galaxea fascicularis*** and net RNS production of **c) *E. diaphana*** and **d) *G. fascicularis***. Net ROS was measured as signal intensity of CellROX stained symbiodiniacean cells. Net RNS was measured as signal intensity of DAF-FM DA stained symbiodiniacean cells. Signal intensities were normalized by subtracting the median signal of unstained cells to control for autofluorescence. Bars depict standard deviation.  $N=5$  per sea anemone genotype or coral colony per temperature treatment.

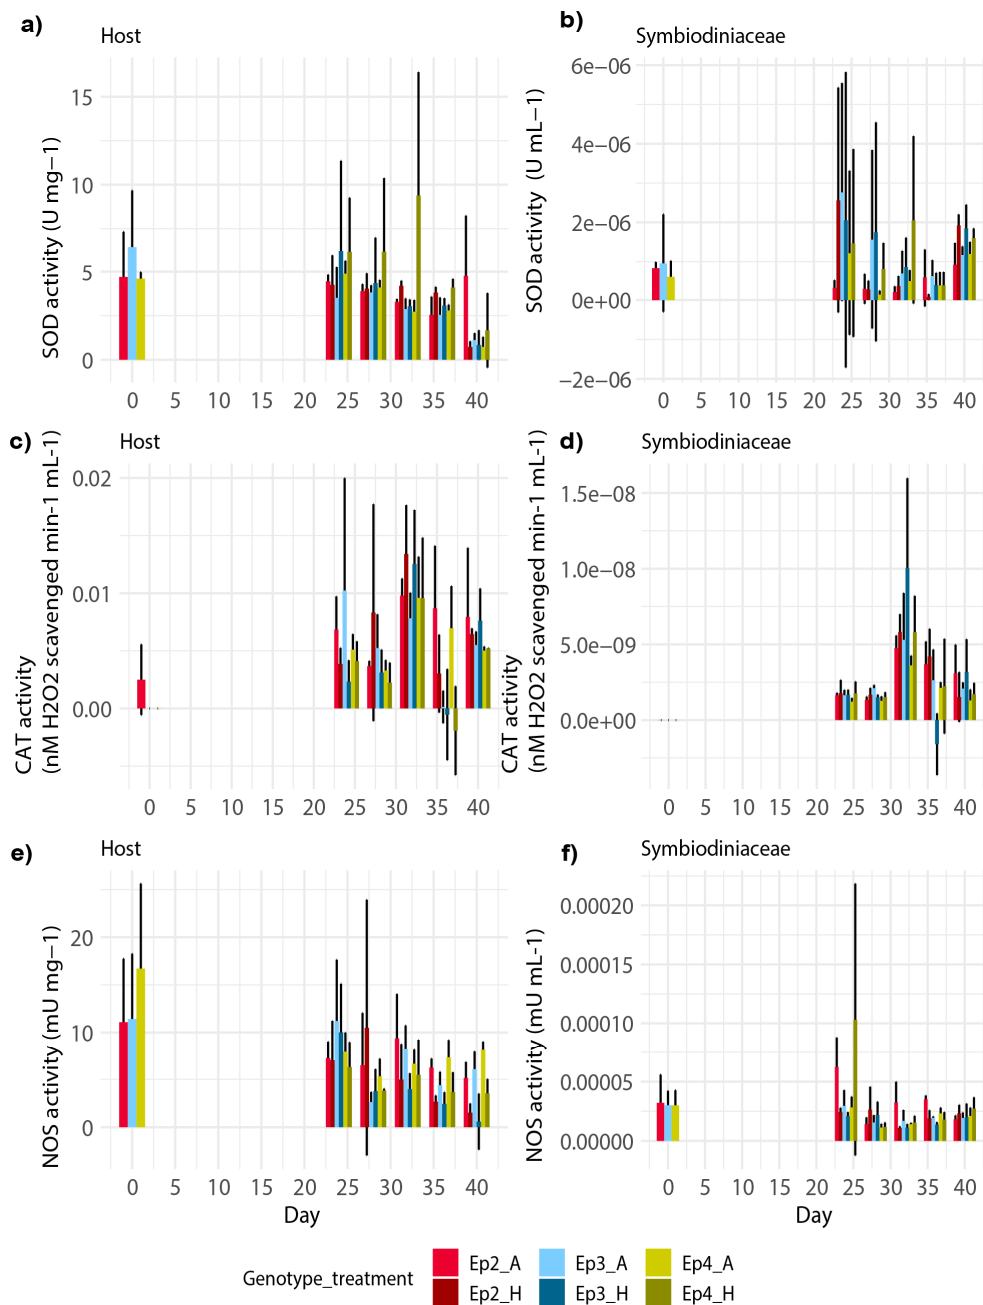

**Supplemental Figure 8.** Activities of SOD in a) host and b) symbiodiniaceans, of CAT in c) host and d) symbiodiniaceans and of NOS in e) host and f) symbiodiniacean compartments of *Exaiptasia diaphana*. Bars depict standard deviation.  $N=4$  per genotype per temperature treatment.

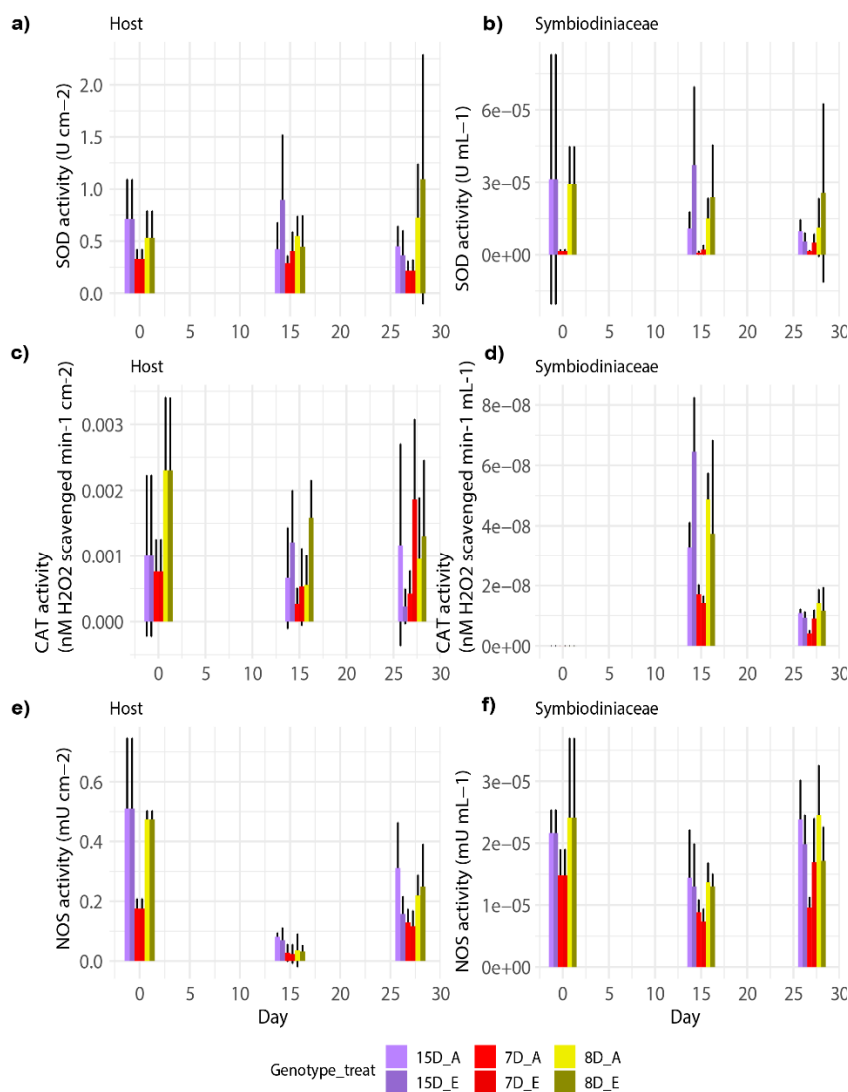

**Supplemental Figure 9.** Activities of SOD in a) host and b) Symbiodiniaceans, of CAT in c) host and d) symbiodiniaceans and of NOS in e) host and f) symbiodiniacean compartments of *Galaxea fascicularis*. Bars depict standard deviation.  $N=4$  per colony per temperature treatment.

## 2. Supplemental Tables

**Supplemental Table 1.** Comparison of experimental settings and results of bleaching parameters of studies using GBR-sourced *Exaiptasia diaphana* genotypes. Results of bleaching parameters are displayed as relative changes of measured parameters in the elevated compared to the ambient temperature treatments at the last sampling timepoints of the experiments. Asterisks display statistical significance ( $p$ -value  $<0.001=***$ ,  $<0.05=*$ ).

| Author                  | Study                                                                                                                                     | Light conditions                                   | <i>Exaiptasia diaphana</i> genotype | Temperature profile in elevated treatment                                                                                                                             | Temperature in ambient treatment   | Relative change in elevated versus ambient treatment at the last sampling timepoint |                                                  |                                                                                         |
|-------------------------|-------------------------------------------------------------------------------------------------------------------------------------------|----------------------------------------------------|-------------------------------------|-----------------------------------------------------------------------------------------------------------------------------------------------------------------------|------------------------------------|-------------------------------------------------------------------------------------|--------------------------------------------------|-----------------------------------------------------------------------------------------|
|                         |                                                                                                                                           |                                                    |                                     |                                                                                                                                                                       |                                    | Maximum quantum yield                                                               | Symbiodiniaceae density                          | net ROS production (if measured)                                                        |
| This study              |                                                                                                                                           | 15-20 $\mu\text{mol photons m}^{-2} \text{s}^{-1}$ | AIMS2, AIMS3, AIMS4                 | Day 0-24: increase of 0.25 °C/day to 32 °C (24 days), Day 24-40: constant 32°C (17 days)                                                                              | Day 0-40: constant 26 °C           | Significantly lower ***                                                             | No significant difference                        | Significantly higher ***, but this may be caused by a decrease in the ambient treatment |
| Dungan et al. 2022 [45] | Lack of evidence for the oxidative stress theory of bleaching in the sea anemone, <i>Exaiptasia diaphana</i> , under elevated temperature | 15-20 $\mu\text{mol photons m}^{-2} \text{s}^{-1}$ | AIMS3                               | Day 0-7: increase of 1 °C/day to 32 °C (6 days), Day 7-9: constant 32 °C (4 days), Day 10-12 increase of 1 °C/day to 34 °C (2 days), day 13: constant 34 °C (one day) | Day 0-13: constant 26 °C (14 days) | Significantly lower *                                                               | Significantly lower *                            | No significant difference                                                               |
| Dungan et al. 2022 [46] | Exploring microbiome engineering as a strategy                                                                                            | 28 $\mu\text{mol photons m}^{-2} \text{s}^{-1}$    | AIMS2, AIMS3, AIMS4                 | Day 0-7: constant 26 °C during inoculation (8 days), Day 8-31: increase of 0.25 °C/day                                                                                | Day 0-43: constant 26 °C (44 days) | Significantly lower *                                                               | Significantly lower * (for AIMS2 and AIMS3 only) | No significant difference                                                               |

|                                       |                                                                                                                                       |                                                                      |       |                                                                            |                                |                          |                          |                     |
|---------------------------------------|---------------------------------------------------------------------------------------------------------------------------------------|----------------------------------------------------------------------|-------|----------------------------------------------------------------------------|--------------------------------|--------------------------|--------------------------|---------------------|
|                                       | y for<br>improv<br>ed<br>thermal<br>toleran<br>ce in<br><i>Exaipta<br/>sia<br/>diapha<br/>na</i>                                      |                                                                      |       | to 31.5 °C<br>(23 days),<br>Day 31-43:<br>constant<br>31.5 °C (12<br>days) |                                |                          |                          |                     |
| Hart<br>man<br>et al.<br>2019<br>[50] | The<br>Effect<br>of<br>Therma<br>l Stress<br>on the<br>Bacteri<br>al<br>Microbi<br>ome of<br><i>Exaipta<br/>sia<br/>diapha<br/>na</i> | 31.8-<br>33.8<br>μmol<br>photon<br>s m <sup>-2</sup> s <sup>-1</sup> | AIMS2 | Day 0-14:<br>increase of<br>1 °C/day to<br>33 °C (15<br>days)              | Day 0-14:<br>constant 26<br>°C | Significantly<br>lower * | Significantly<br>lower * | Not<br>measur<br>ed |

**Supplemental Table 2.** Symbiodiniacean communities of the three coral colonies used in this study. All colonies were exclusively associated with *Durisdinium trenchii* (ITS2 profile D1-D4-D4c-D1ev-D10). #Non-profile sequences are sequences that have no ITS2 profile match.

| Sample name | Sample category  | Relative abundance (%)                              |                                    |
|-------------|------------------|-----------------------------------------------------|------------------------------------|
|             |                  | <i>Durisdinium trenchii</i><br>(D1-D4-D4c-D1ev-D10) | Non-profile sequences <sup>#</sup> |
| G7A         | Coral colony G7  | 92.2                                                | 7.8                                |
| G7B         | Coral colony G7  | 92.3                                                | 7.7                                |
| G8A         | Coral colony G8  | 92.1                                                | 7.9                                |
| G8B         | Coral colony G8  | 92.7                                                | 7.3                                |
| G15A        | Coral colony G15 | 92.8                                                | 7.2                                |
| G15B        | Coral colony G15 | 92.1                                                | 7.9                                |
| NTPCR1      | Negative control | 0                                                   | 0                                  |
| NTPCR2      | Negative control | 0                                                   | 0                                  |
| ExtBlank    | Negative control | 0                                                   | 0                                  |
